# Supplementary material for: Muconic acid esters as bio-based acrylate mimics
Source: Royal Society of Chemistry journal article supplement (doi:10.1039/c9py01313j), 2019-01-01
Supplement: c9py01313j1.pdf [file c9py01313j1.pdf]

# Supporting information

## Muconic acid esters as bio-based acrylate mimics

Greg Quintens, Jeroen H. Vrijsen, Peter Adriaensens, Dirk Vanderzande, Tanja Junkers

### A Nuclear Magnetic Resonance (NMR)

For all monomers and polymers synthesized within this research,  $^1\text{H}$  and  $^{13}\text{C}$  NMR were measured and displayed below. All peaks are defined by corresponding colored dots on the structure and NMR spectra.

#### A.1 Monomer synthesis

##### A.1.1 Diethyl muconate (DEM)

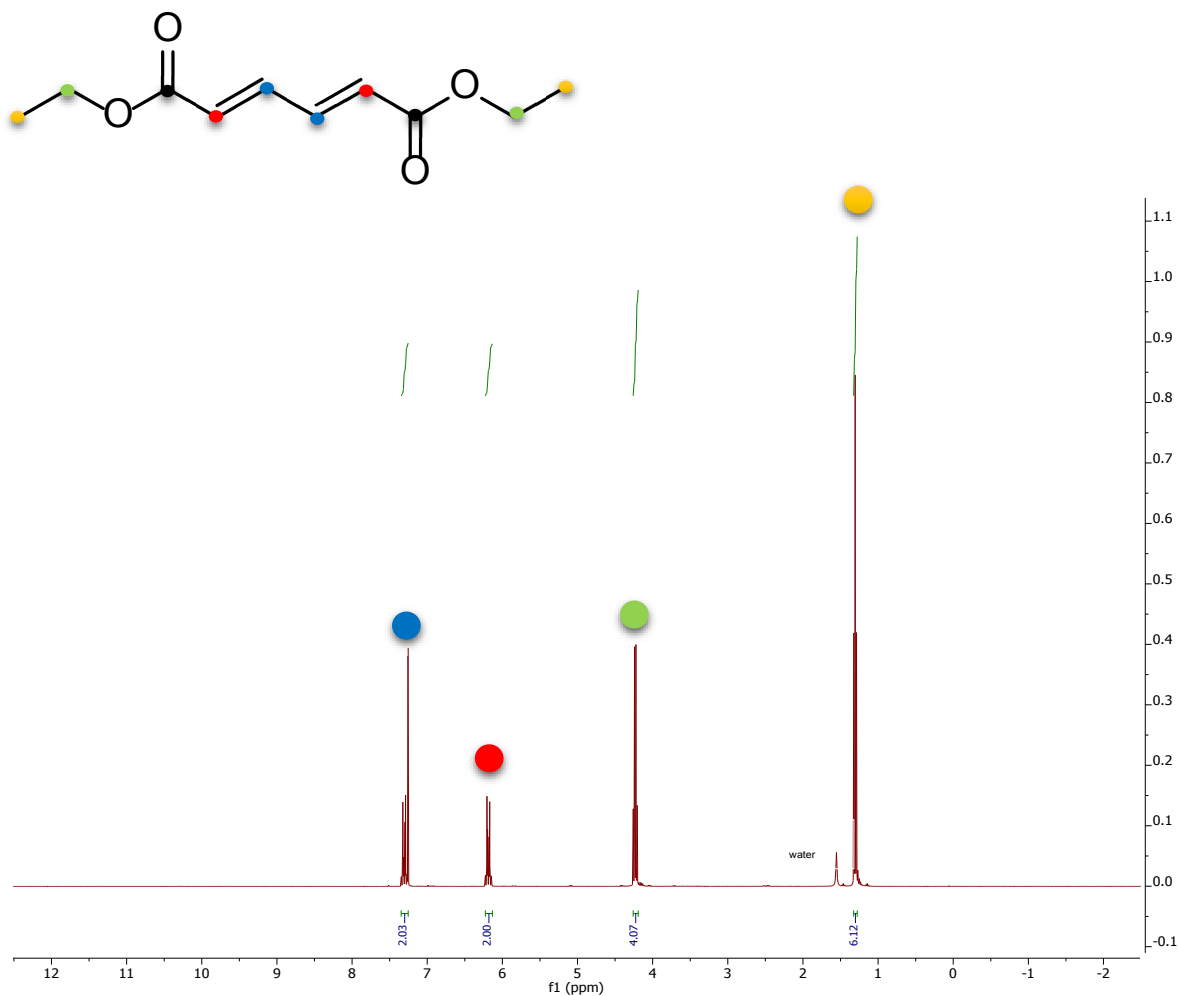

Figure S 1  $^1\text{H}$  NMR of diethyl muconate (DEM)

# Supporting information

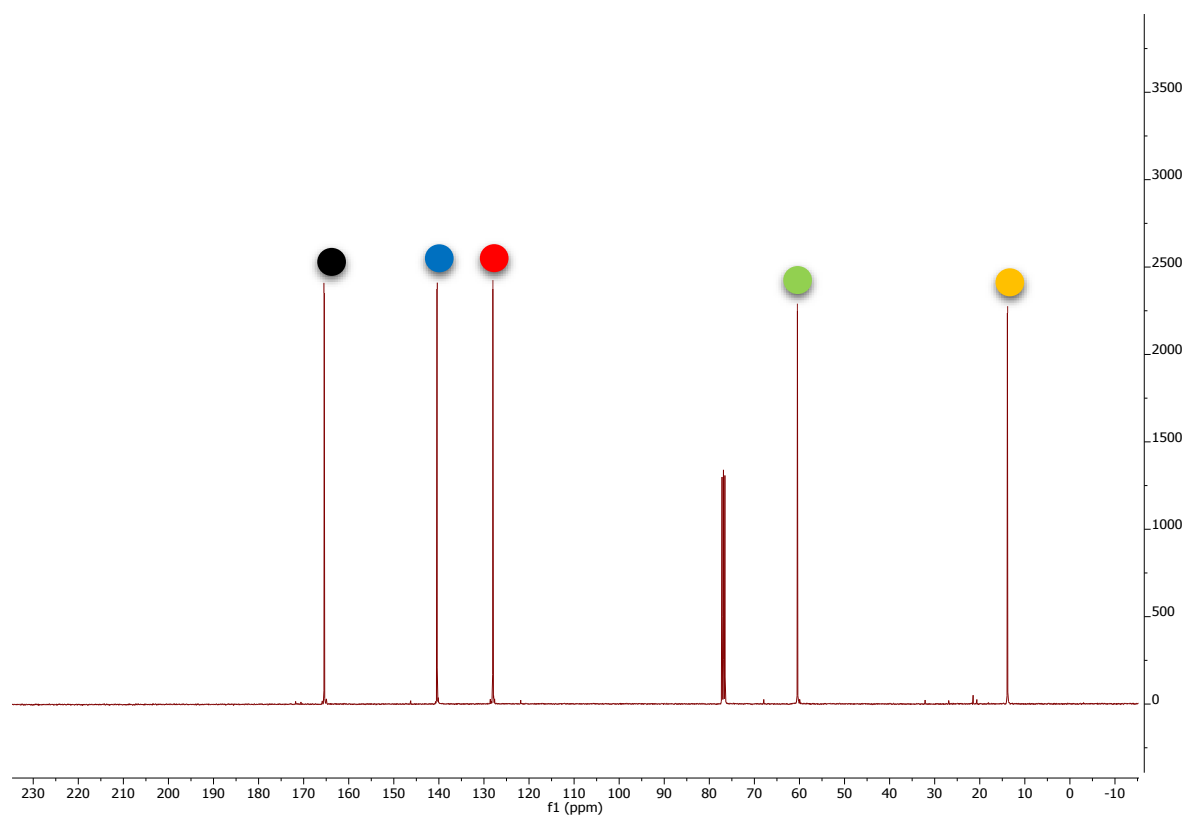

Figure S 2  $^{13}\text{C}$  NMR of diethyl muconate (DBM)

# Supporting information

## A.1.2 Dibutyl muconate (DBM)

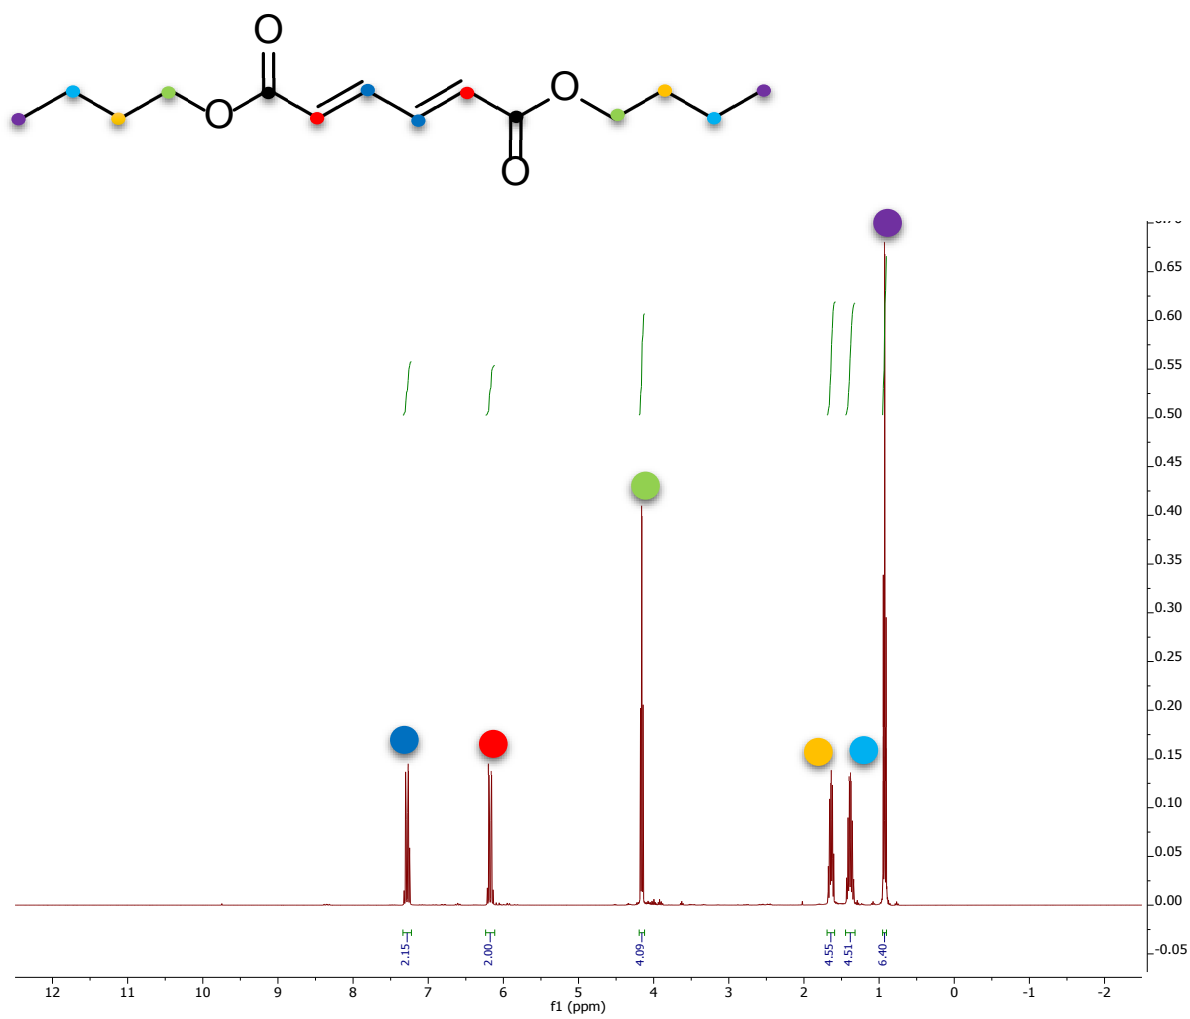

Figure S 3 <sup>1</sup>H NMR of dibutyl muconate (DBM)

# Supporting information

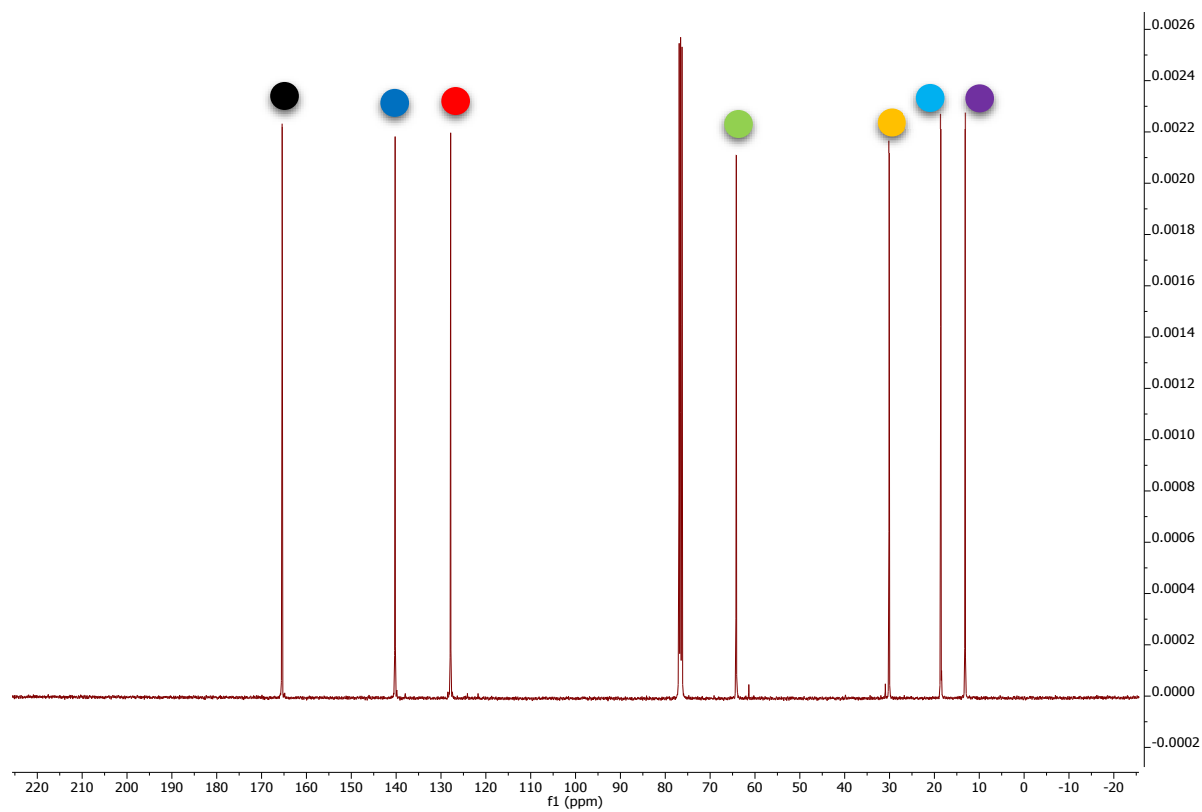

Figure S 4  $^{13}\text{C}$  NMR of dibutyl muconate (DBM)

# Supporting information

## A.1.3 Di-(2-ethylhexyl) muconate (DEHM)

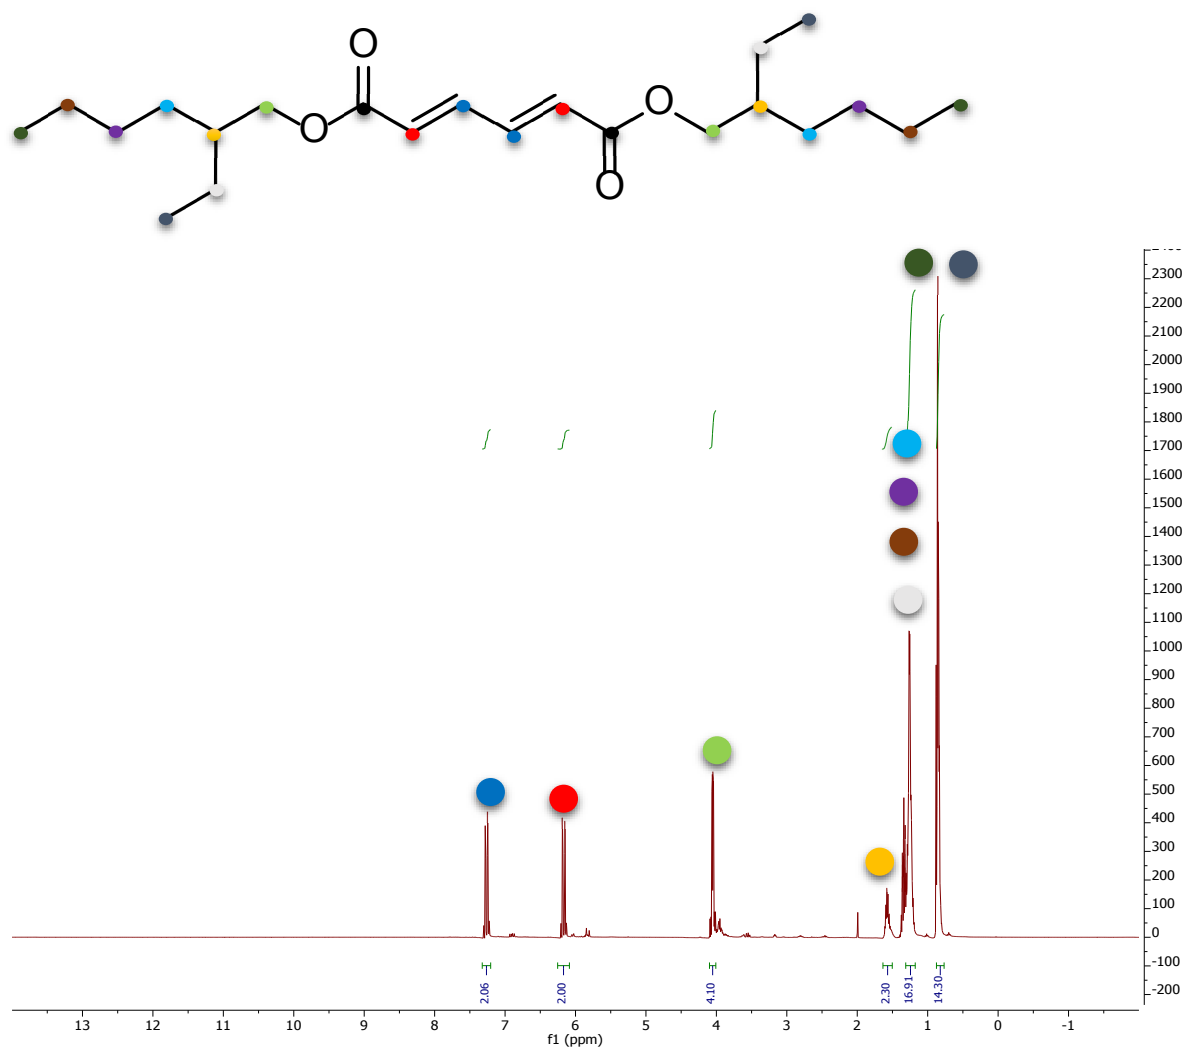

Figure S 5  $^1\text{H}$  NMR of di-(2-ethylhexyl) muconate (DEHM)

# Supporting information

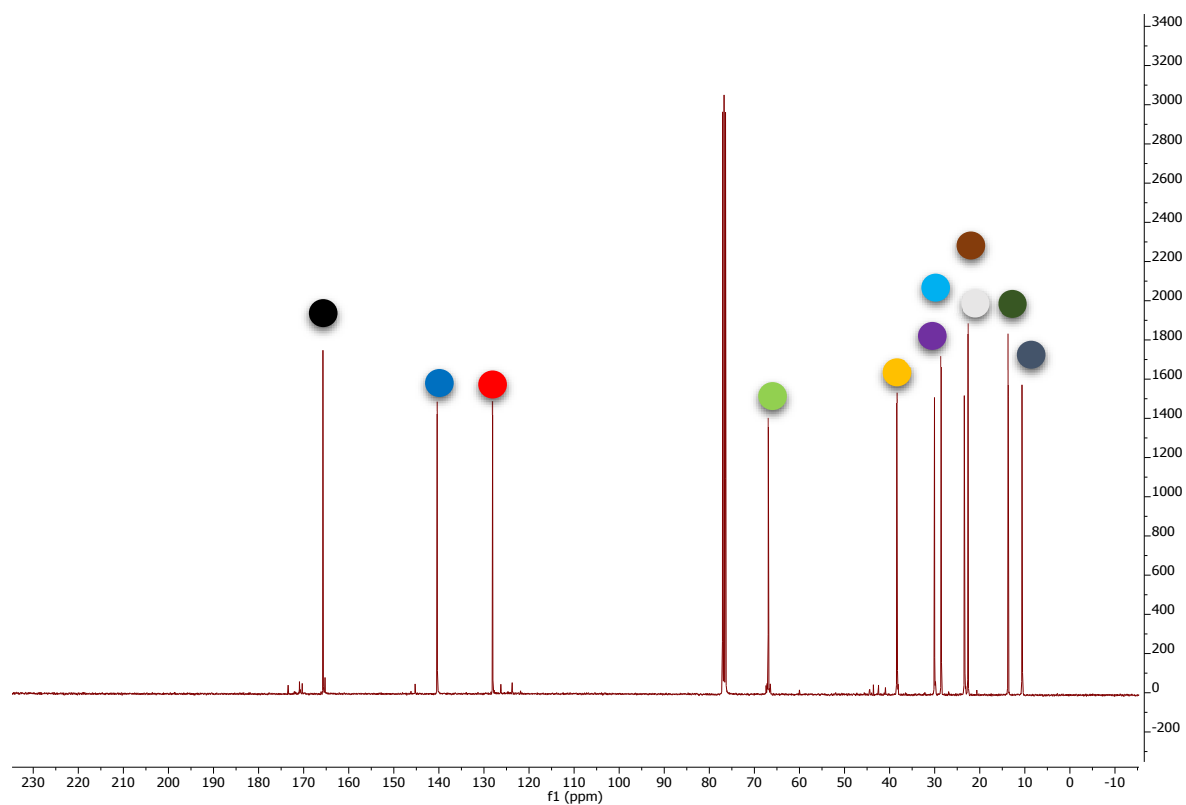

Figure S 6  $^{13}\text{C}$  NMR of di-(2-ethylhexyl) muconate (DEHM)

## A.2 Polymerization

### A.2.1 PDEM

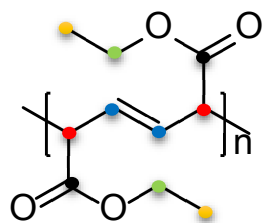

# Supporting information

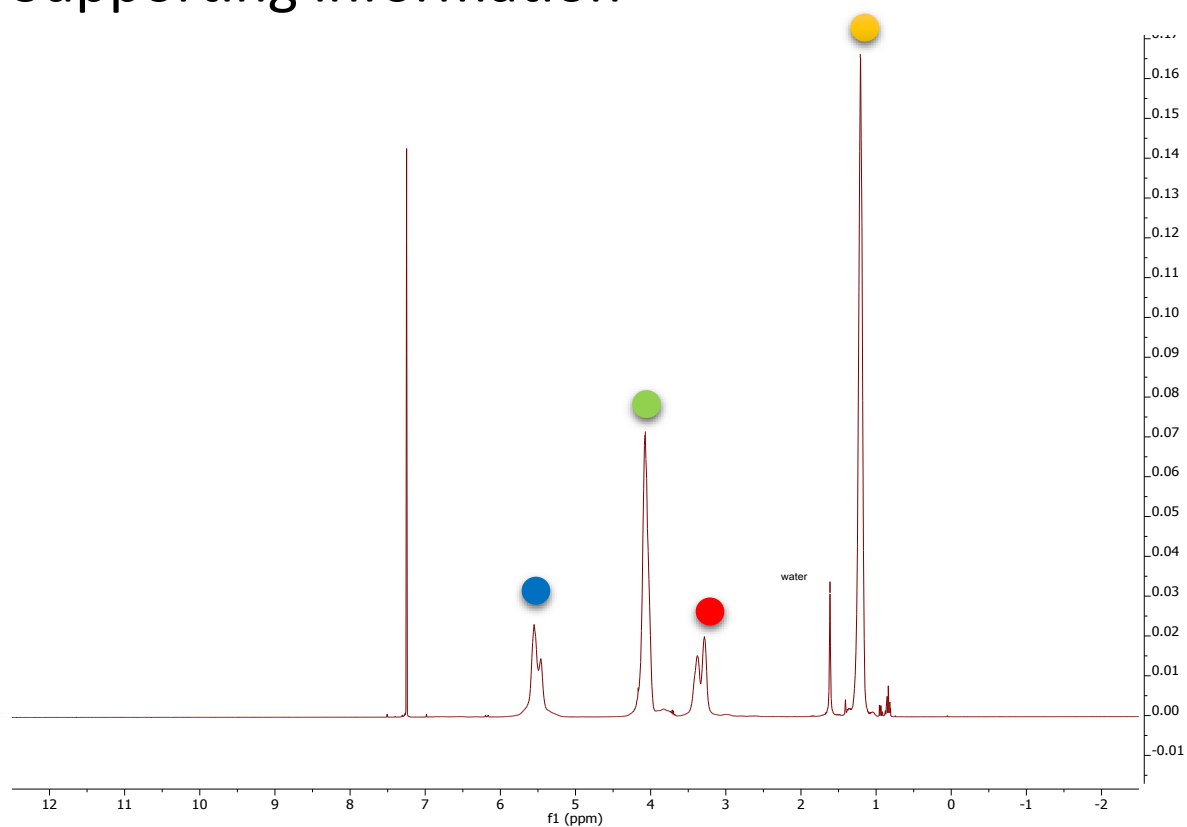

Figure S 7  $^1\text{H}$  NMR of poly(diethyl muconate) (PDEM)

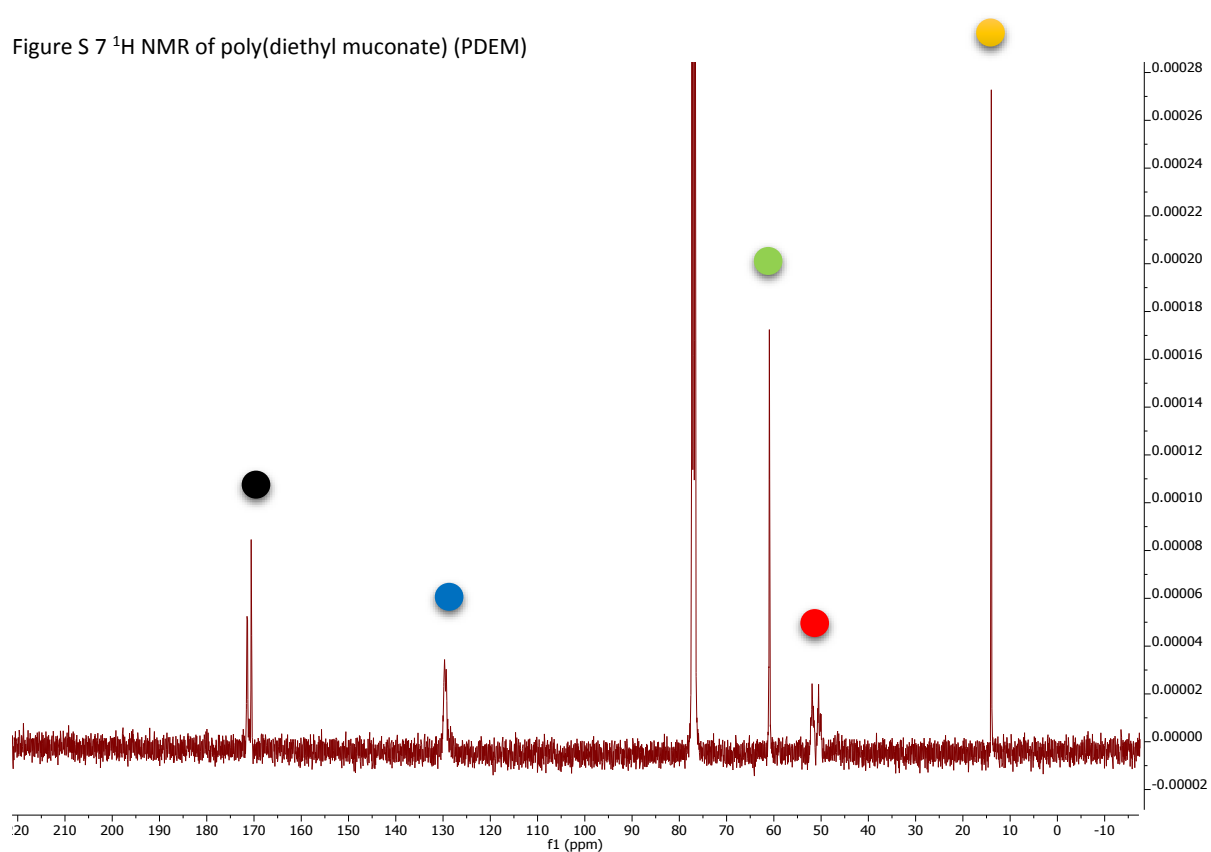

Figure S 8  $^{13}\text{C}$  NMR of poly(diethyl muconate) (PDEM)

# Supporting information

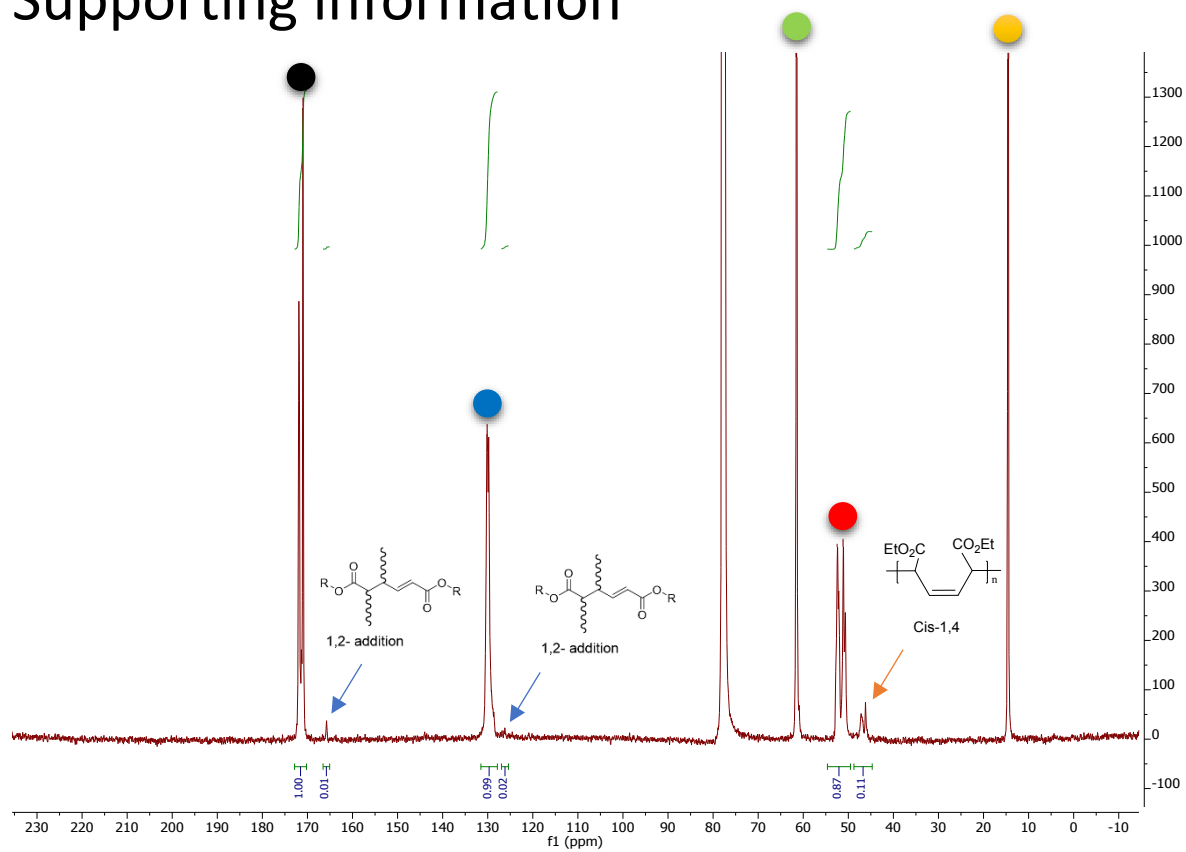

Figure S 9 Quantitative  $^{13}\text{C}$  NMR Of poly(diethyl muconate) (PDEM)

## A.2.2 PDBM

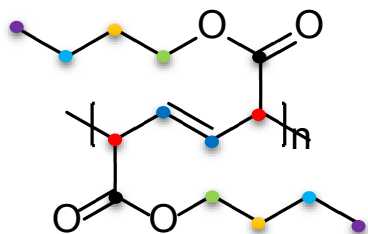



# Supporting information

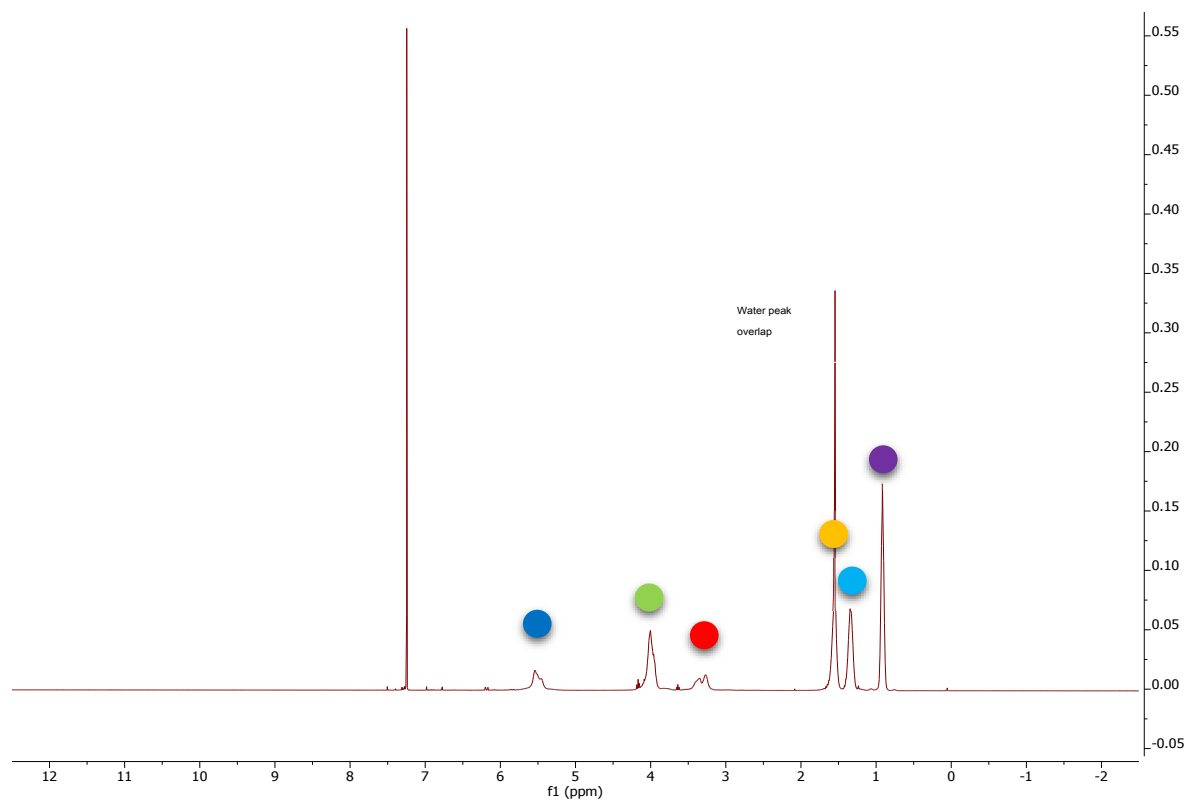

Figure S 10  $^1\text{H}$  NMR of poly(dibutyl muconate) (PDBM)

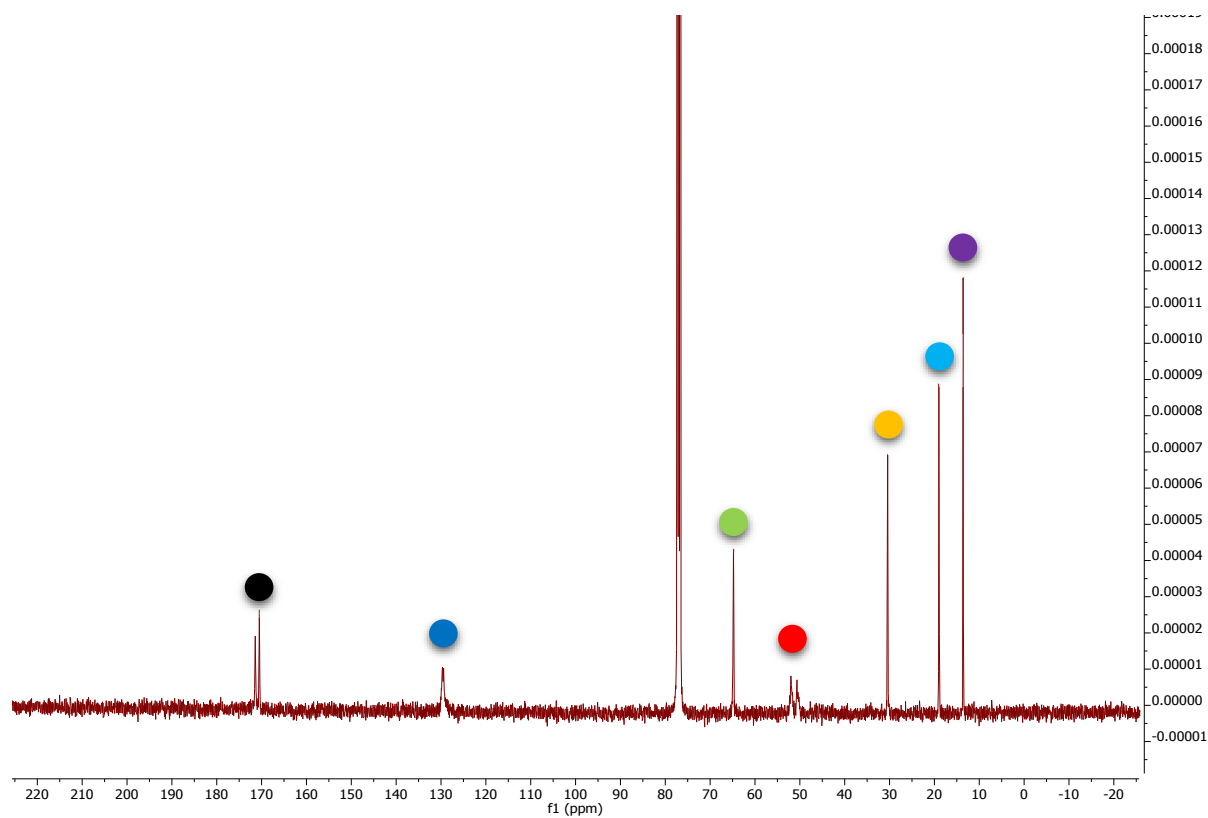

Figure S 11  $^{13}\text{C}$  NMR of poly(dibutyl muconate) (PDBM)

# Supporting information

## A.2.3 PDEHM

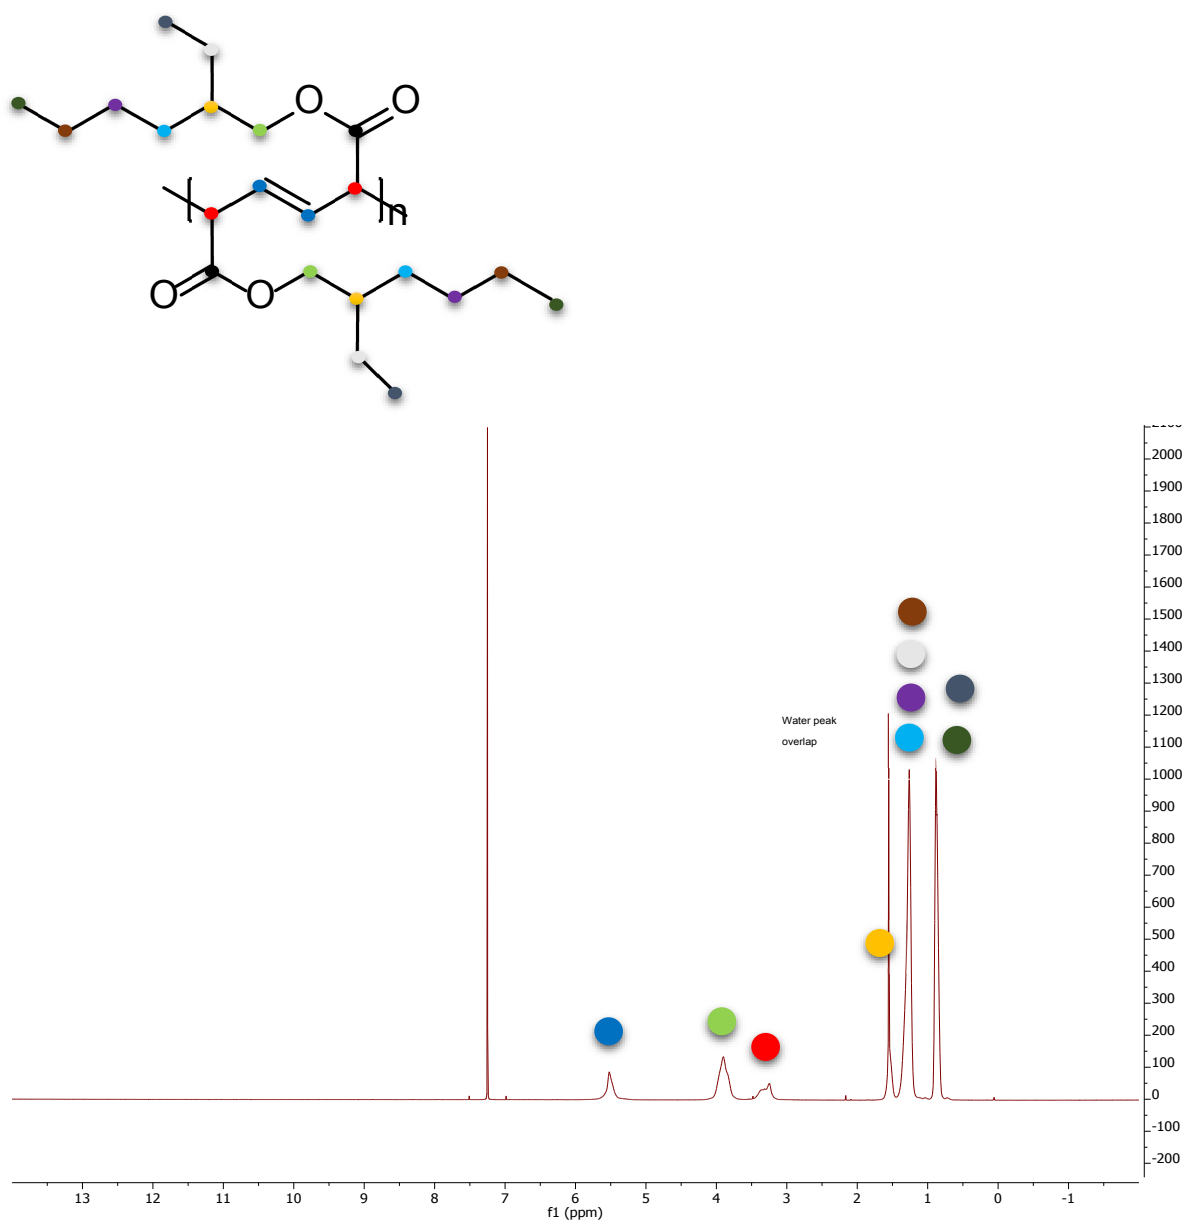

Figure S 12  $^1\text{H}$  NMR of poly(di-(2-ethylhexyl) muconate) (PDEHM)

# Supporting information

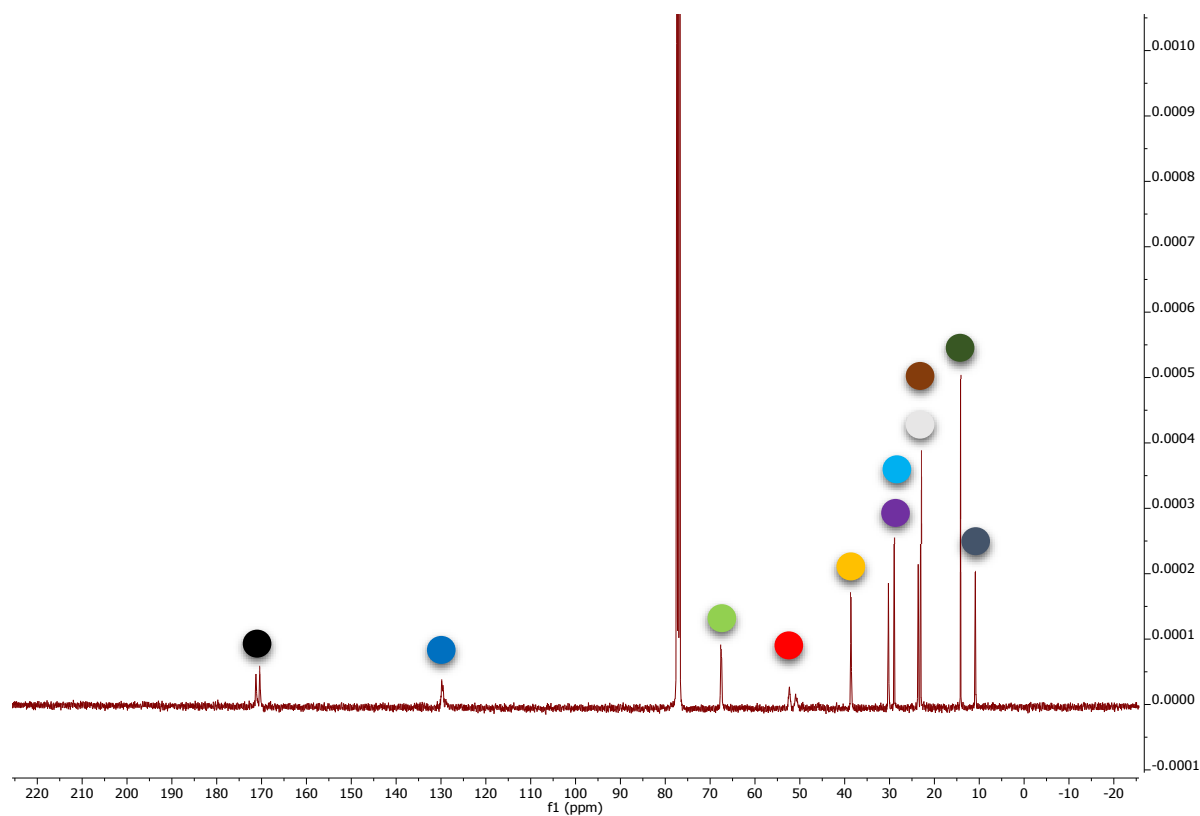

Figure S 13  $^{13}\text{C}$  NMR of poly(di-(2-ethylhexyl) muconate) (PDEHM)

## B Size Exclusion Chromatography (SEC)

### B.1 Free Radical Polymerization (FRP)

#### B.1.1 PDEM

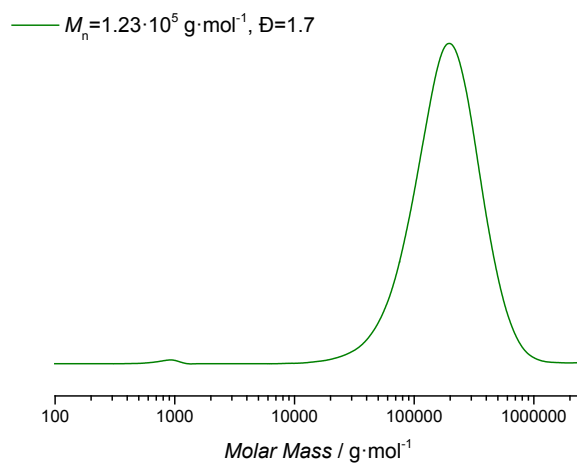

Figure S 14 Molecular weight distribution of PDEM after purification via precipitation.

# Supporting information

## B.1.2 PDBM

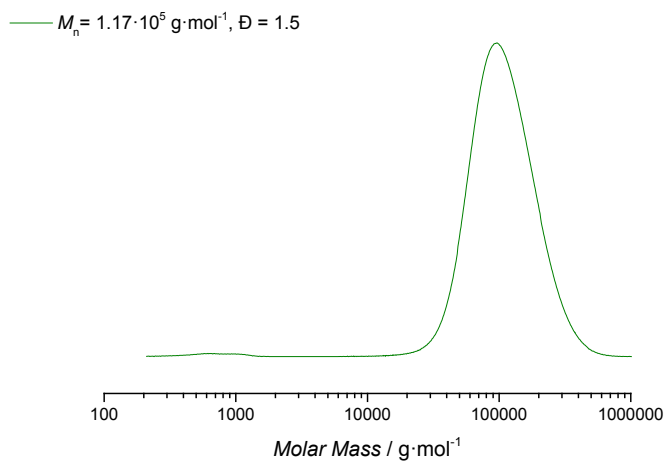

Figure S 15 Molecular weight distribution of PDBM after purification via precipitation.

## B.1.3 PDEHM

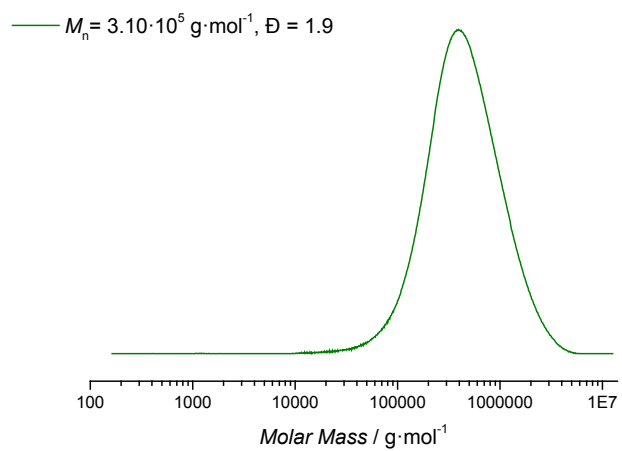

Figure S 16 Molecular weight distribution of PDEHM after purification via precipitation.

# Supporting information

## B.2 Mark-Houwink parameters

Mark-Houwink coefficients of PDEHM, PDEM and PDBM ( $\alpha$  and  $K$ ) were determined via SEC-MALS using a Tosoh EcoSEC coupled to a Dawn Heleos II multi angle light scattering detector and an Optilab TrEX refractive index detector from Wyatt Technology. Tetrahydrofuran (THF) is used as eluent at 40°C with a flowrate of 1 mL·min<sup>-1</sup>. The  $dn/dc$  values of the polymers were determined via 100% mass recovery. The intrinsic viscosities ( $[\eta]$ ) of the analytes for every measured molecular weight (MW) datapoint was then determined via universal calibration with narrow polystyrene standards from Polymer Standards Service (PSS) by using the Mark-Houwink equation:

$$[\eta]_{\text{analyte}} \cdot MW_{\text{analyte}} = [\eta]_{\text{polystyrene}} \cdot MW_{\text{polystyrene}}$$
$$[\eta]_{\text{analyte}} = \frac{[\eta]_{\text{polystyrene}} \cdot MW_{\text{polystyrene}}}{MW_{\text{analyte}}}$$

Mark-Houwink plots were then constructed by plotting the measured molecular weight versus the calculated intrinsic viscosities on logarithmic scales. A linear fit was then performed of which the slope and intercept respectively equal  $\alpha$  and  $\log(K)$ . The calculated variables for the various analytes are given in Table S 1.

Table S 1: Experimentally determined  $dn/dc$  and calculated Mark-Houwink values of PDEHM, PDEM and PDBM.

| analyte | $dn/dc$<br>(mL·mg <sup>-1</sup> ) | $\alpha$ | $K$                  | MW range<br>(g·mol <sup>-1</sup> ) |
|---------|-----------------------------------|----------|----------------------|------------------------------------|
| PDEHM   | 0.065                             | 0.81     | $1.8 \times 10^{-3}$ | $10^5$ - $10^6$                    |
| PDEM    | 0.066                             | 0.88     | $1.3 \times 10^{-3}$ | $10^3$ - $10^6$                    |
| PDBM    | 0.063                             | 0.86     | $1.6 \times 10^{-3}$ | $10^3$ - $10^6$                    |

Strictly speaking, the parameters given above are only valid in the MW range covered in the MALLS experiments (see table).

## B.3 Reproducibility FRP

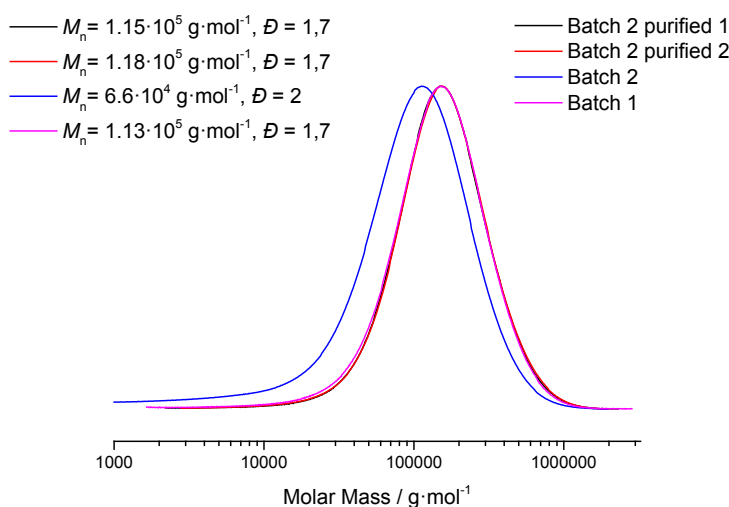

Figure S 17 Reproducibility test using different batches of trans,trans muconic acid.

# Supporting information

## B.4 Thermal Gravimetric Analysis (TGA)

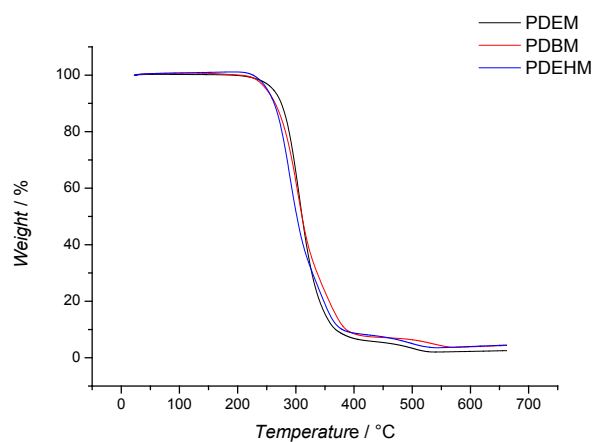

Figure S 18 Combined TGA data of different polyuconates

## B.2.4 Reversible Addition-Fragmentation chain Transfer (RAFT)

### B.2.4.1 Monomer to RAFT variations

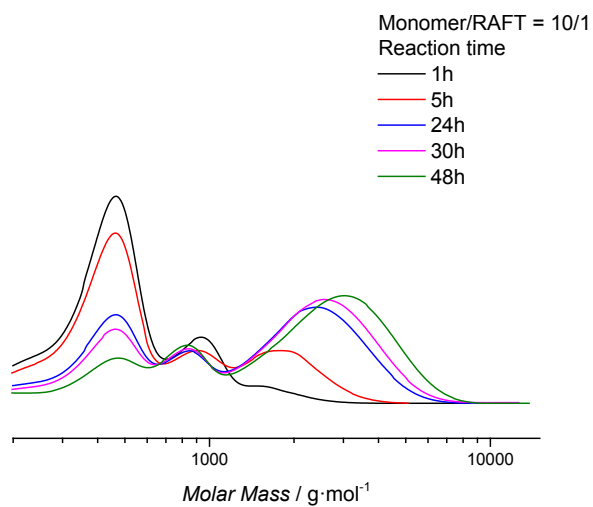

# Supporting information

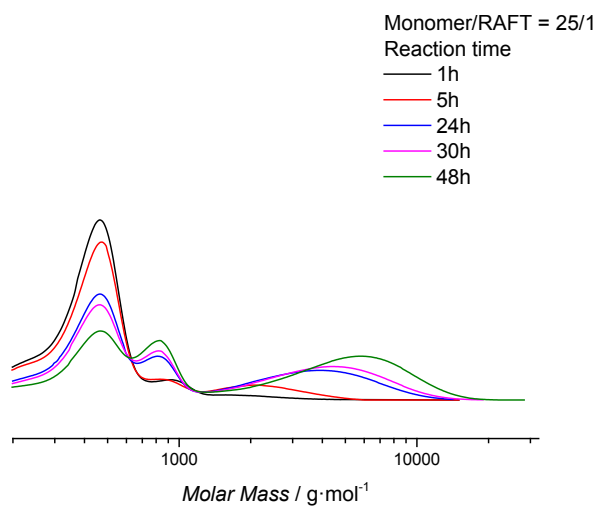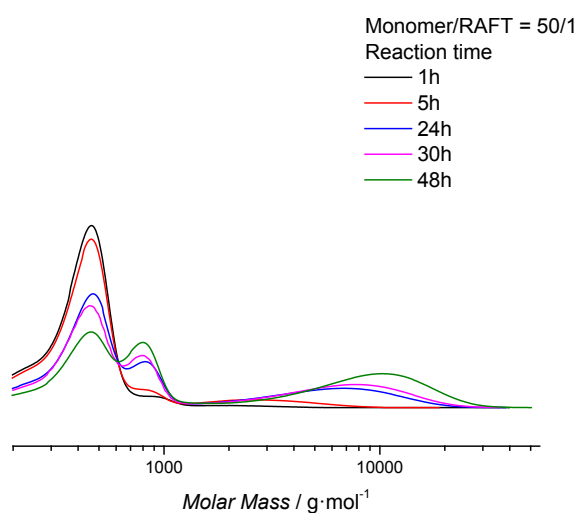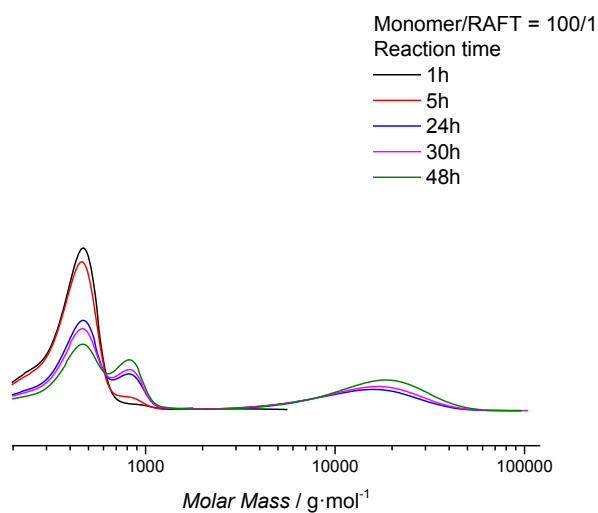

Figure S 19 Overview of monomer to RAFT variations at different reaction times showing the reduction of the monomer peak and the molecular weight distribution of the polymers.

# Supporting information

## B.2.4.2 Overview of all RAFT polymers after 48 h reaction time

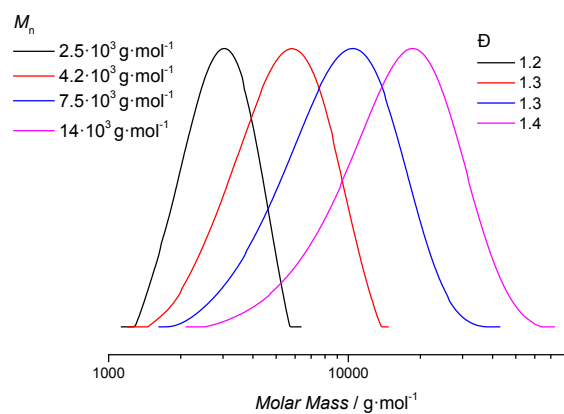

Figure S 20 Molecular weight distributions of the different monomer to RAFT agent ratios after 48 h reaction time.
